# Supplementary material for: Structural insights into regulation of CNNM-TRPM7 divalent cation uptake by the small GTPase ARL15
Source: eLife journal article supplement (doi:10.7554/elife.86129), 2023-07-04
Supplement: fig1-data1 [file elife-86129-fig1-data1-v1.pdf]

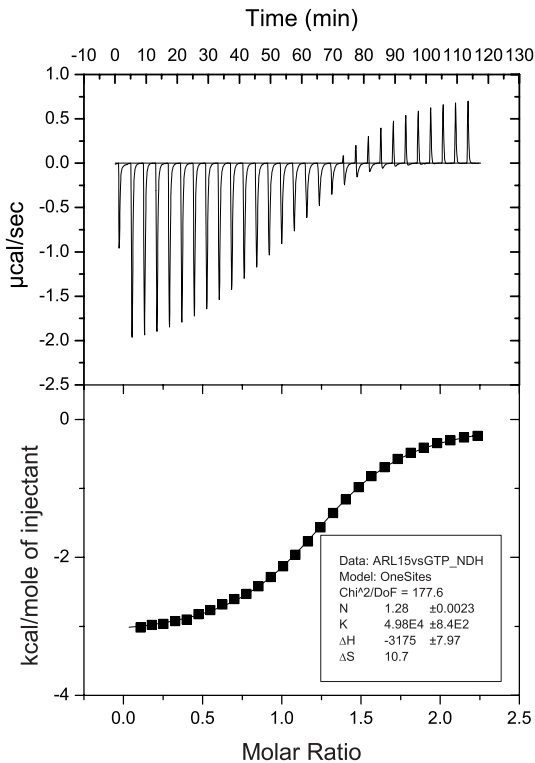

300  $\mu\text{M}$  ARL15 (32-197)  
+ 3 mM GTP
