# Supplementary material for: Structural insights into regulation of CNNM-TRPM7 divalent cation uptake by the small GTPase ARL15
Source: eLife journal article supplement (doi:10.7554/elife.86129), 2023-07-04
Supplement: fig2-data1 [file elife-86129-fig2-data1-v1.pdf]

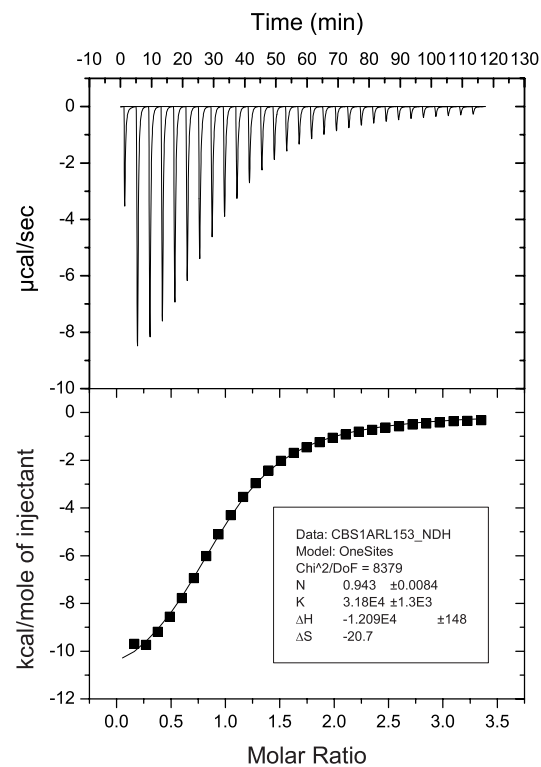

200 μM CNNM1 412-568  
 3 mM ARL15 32-197

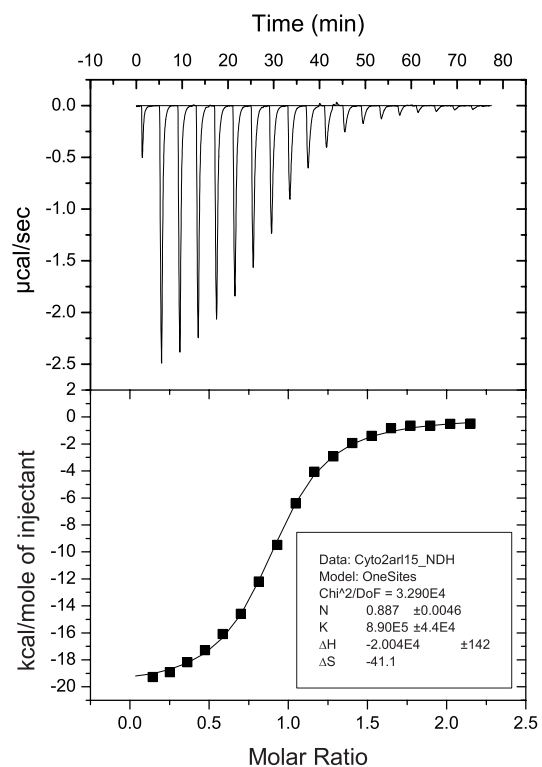

30 μM CNNM2 429-817  
 300 μM ARL15 32-197

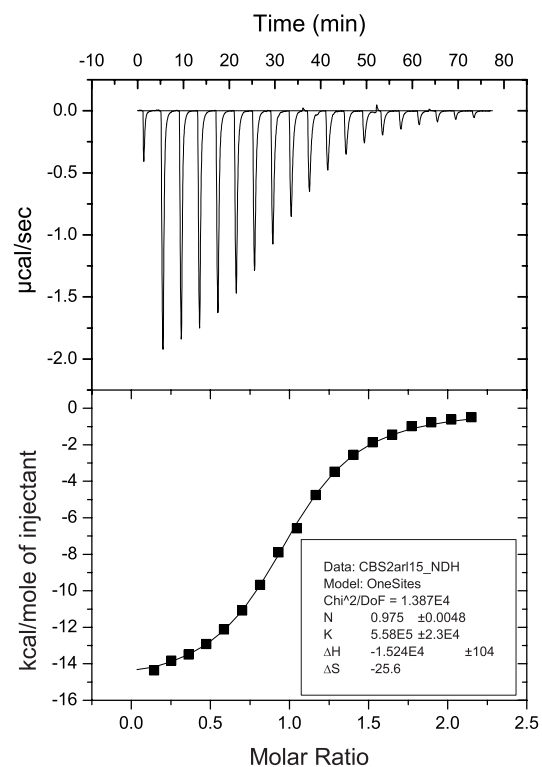

30 μM CNNM2 429-584  
 300 μM ARL15 32-197

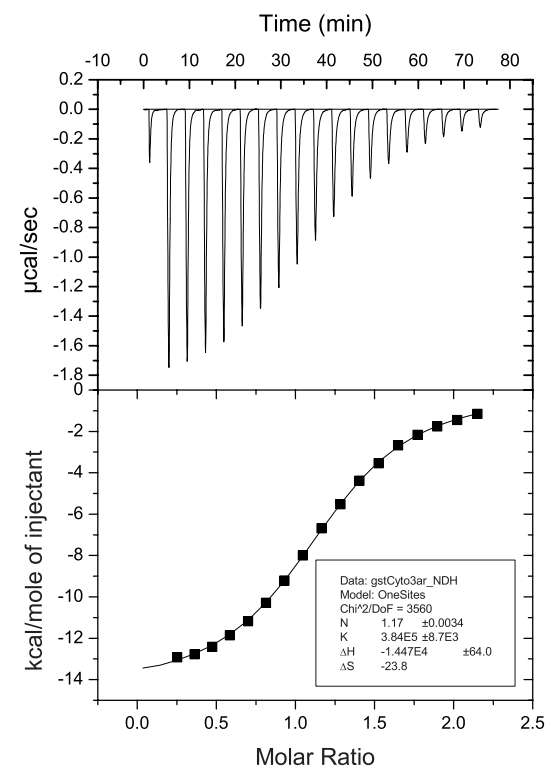

30 μM GST-CNNM3 299-658  
 300 μM ARL15 32-197

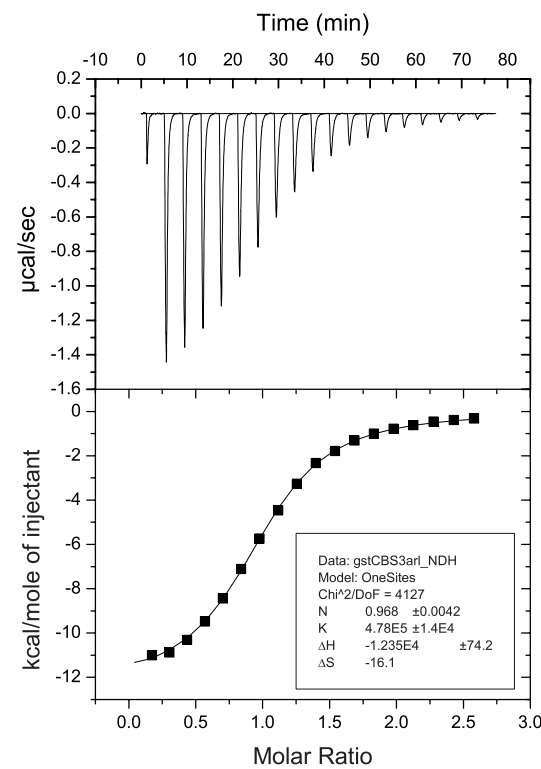

30 μM GST-CNNM3 299-452  
 300 μM ARL15 32-197

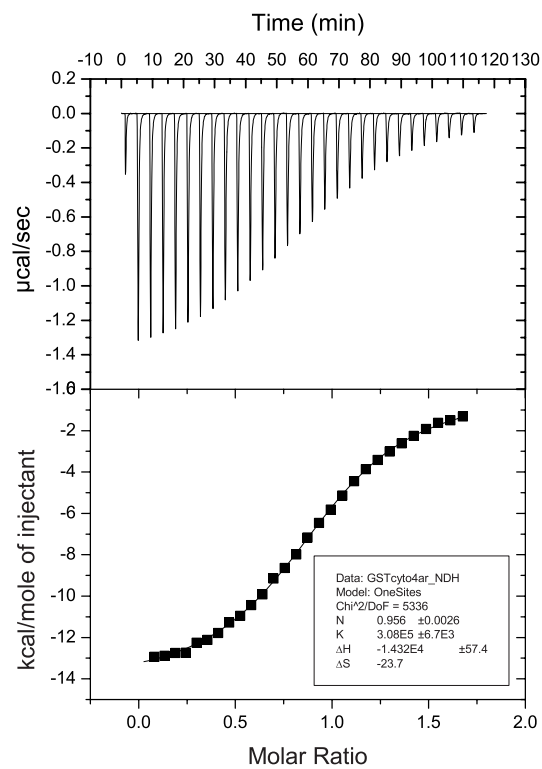

30 μM GST-CNNM4 356-726  
 300 μM ARL15 32-197

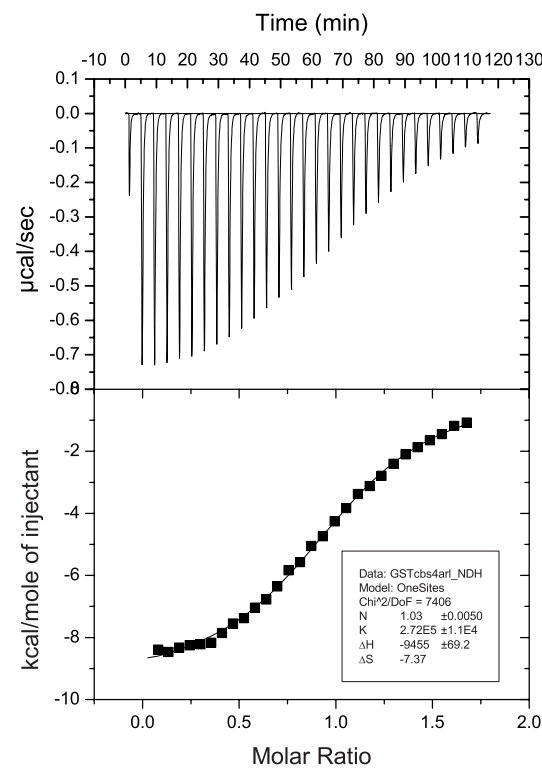

30 μM GST-CNNM4 356-511  
 300 μM ARL15 32-197
