# Supplementary material for: Structural insights into regulation of CNNM-TRPM7 divalent cation uptake by the small GTPase ARL15
Source: eLife journal article supplement (doi:10.7554/elife.86129), 2023-07-04
Supplement: fig2-data2 [file elife-86129-fig2-data2-v1.pdf]

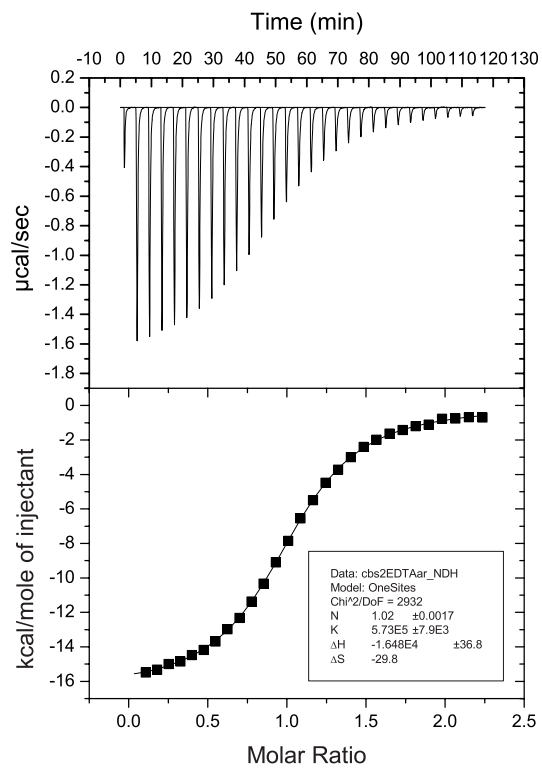

30 μM CNNM2 429-584  
300 μM ARL15 32-197  
in presence of 5 mM EDTA

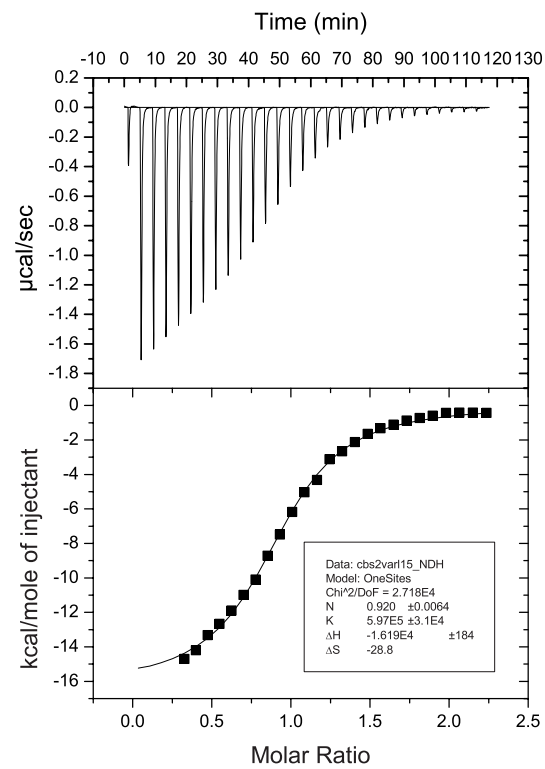

30 μM CNNM2 429-584  
300 μM GTP-loaded ARL15 32-197  
in presence of 1 mM MgCl<sub>2</sub>

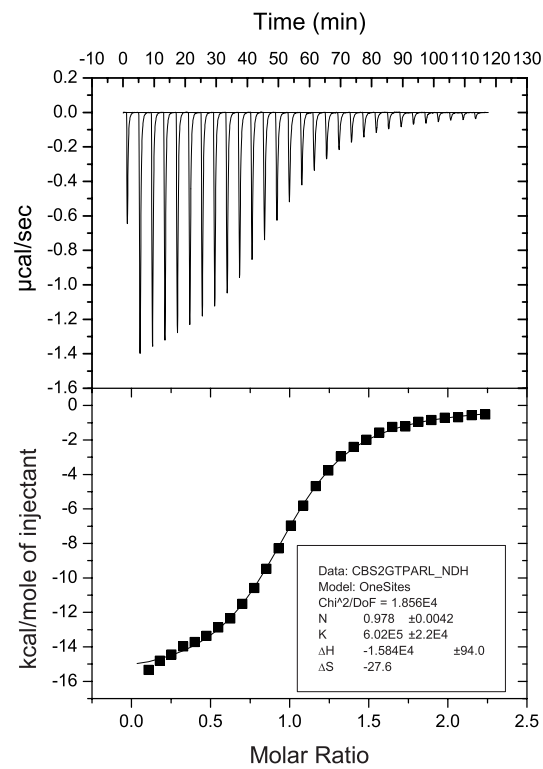

30 μM CNNM2 429-584  
300 μM ARL15 32-197  
in presence of 1 mM MgCl<sub>2</sub> and 1 mM GTP

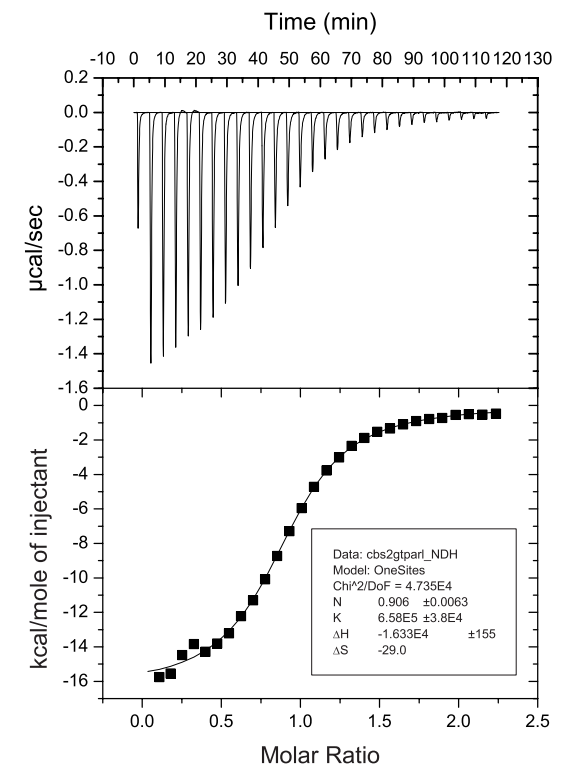

30 μM CNNM2 429-584  
300 μM ARL15 32-197  
in presence of 1 mM MgCl<sub>2</sub> and 1 mM GTP

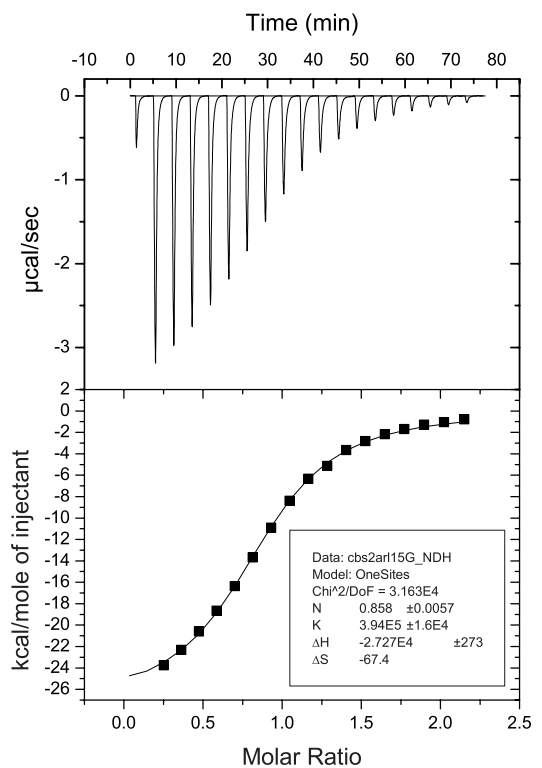

30 μM CNNM2 429-584  
300 μM GDP-loaded ARL15 32-197  
in presence of 1 mM MgCl<sub>2</sub>

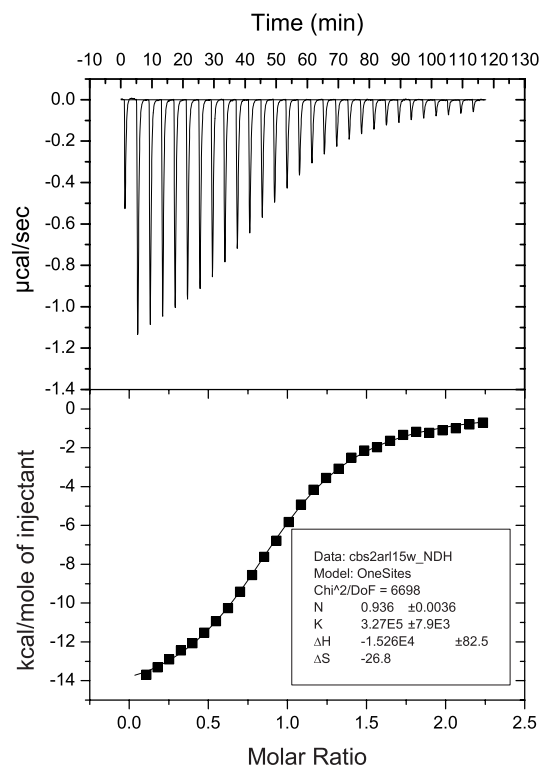

30 μM CNNM2 429-584  
300 μM ARL15 32-197  
in presence of 1 mM MgCl<sub>2</sub> and 3 mM GDP

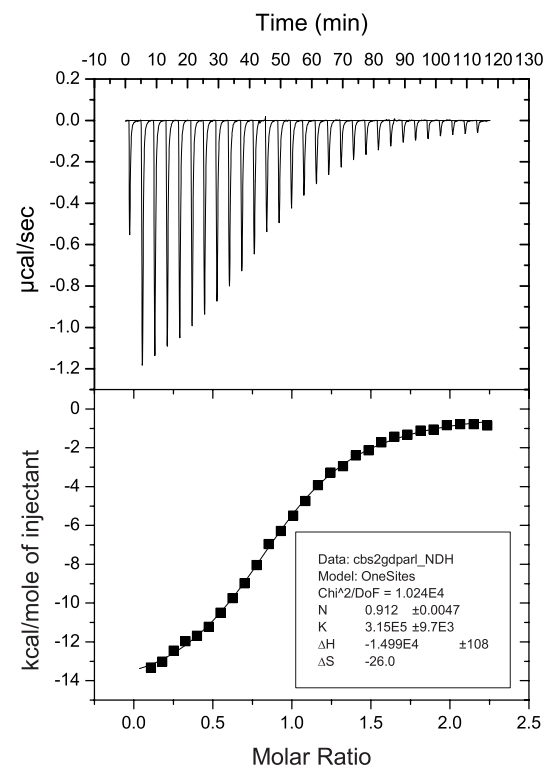

30 μM CNNM2 429-584  
300 μM ARL15 32-197  
in presence of 1 mM MgCl<sub>2</sub> and 3 mM GDP
