# Supplementary material for: Structural insights into regulation of CNNM-TRPM7 divalent cation uptake by the small GTPase ARL15
Source: eLife journal article supplement (doi:10.7554/elife.86129), 2023-07-04
Supplement: fig2-data3 [file elife-86129-fig2-data3-v1.pdf]

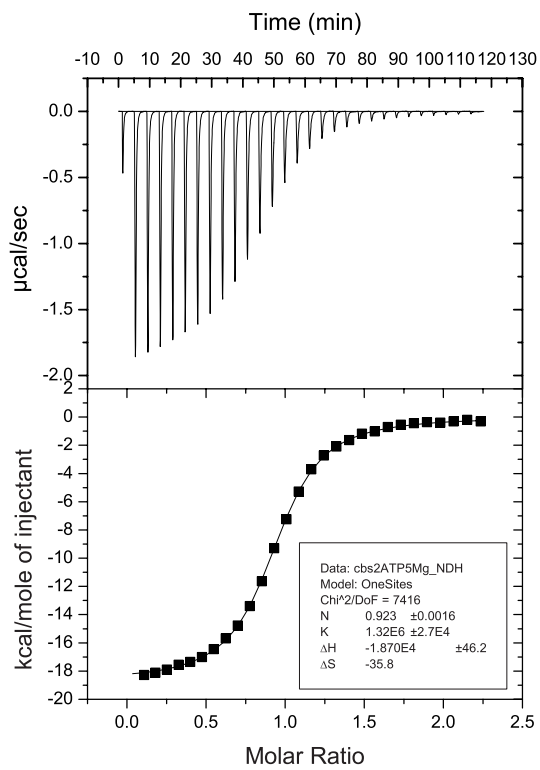

30 µM CNNM2 429-584  
300 µM ARL15 32-197  
in presence of 1 mM ATP  
and 5 mM MgCl<sub>2</sub>

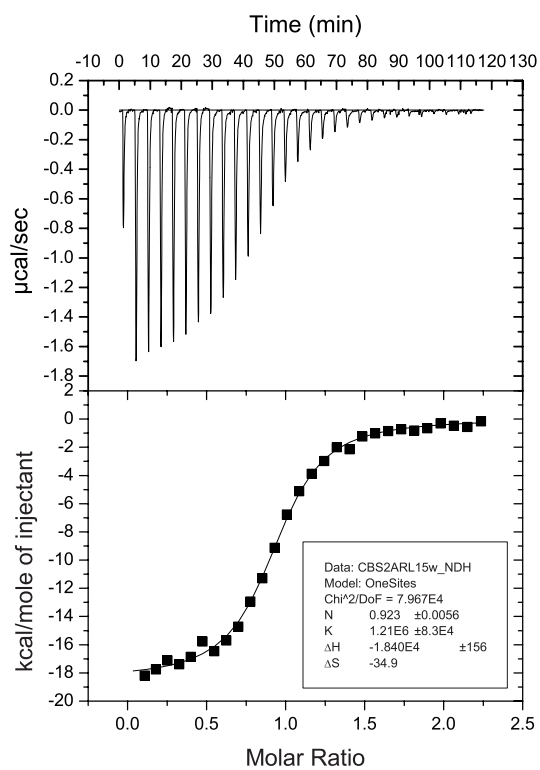

30 µM CNNM2 429-584  
300 µM ARL15 32-197  
in presence of 1 mM ATP  
and 5 mM MgCl<sub>2</sub>

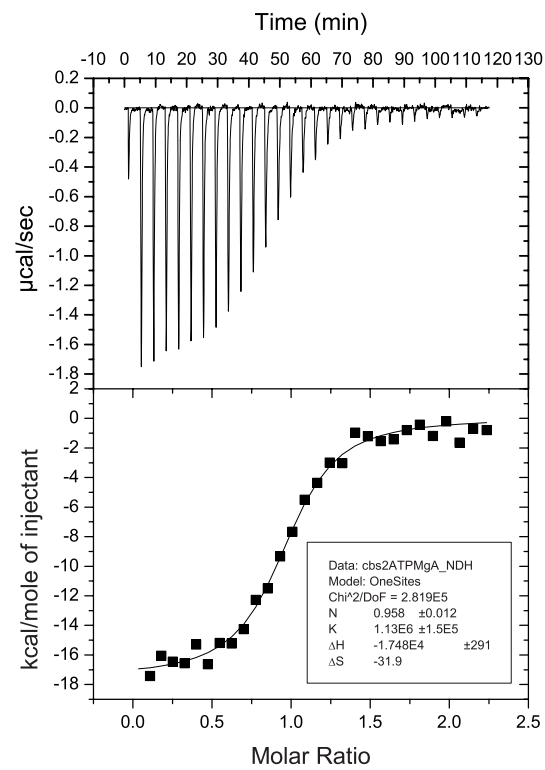

30 µM CNNM2 429-584  
300 µM ARL15 32-197  
in presence of 1 mM ATP  
and 50 mM MgCl<sub>2</sub>

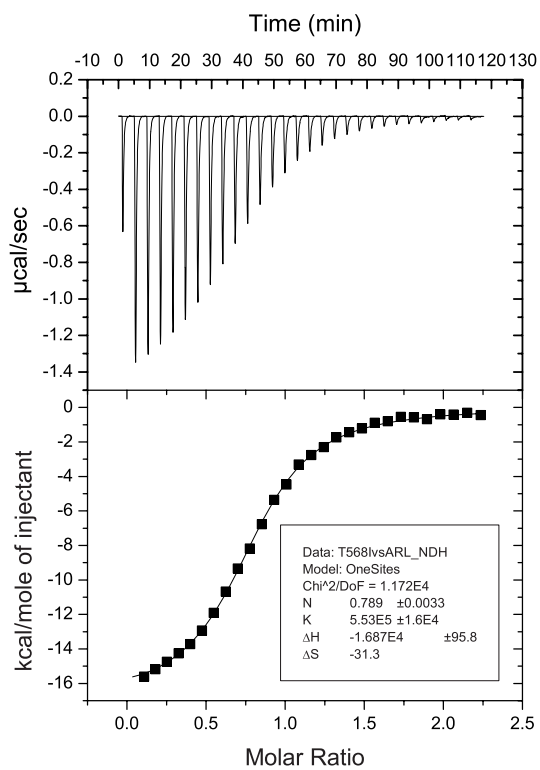

30 µM CNNM2 429-584 **T568I**  
300 µM ARL15 32-197

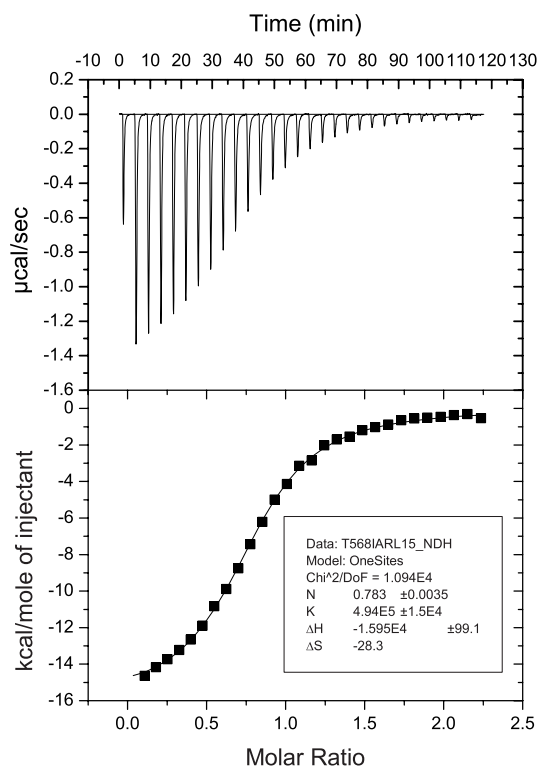

30 µM CNNM2 429-584 **T568I**  
300 µM ARL15 32-197  
in presence of 1 mM ATP  
and 5 mM MgCl<sub>2</sub>
