# Supplementary material for: Structural insights into regulation of CNNM-TRPM7 divalent cation uptake by the small GTPase ARL15
Source: eLife journal article supplement (doi:10.7554/elife.86129), 2023-07-04
Supplement: fig4-data2 [file elife-86129-fig4-data2-v1.pdf]

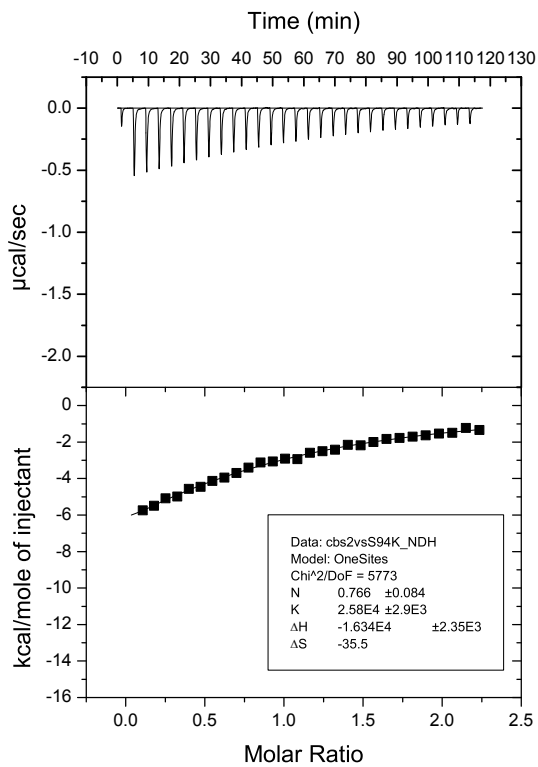

30 µM CNNM2 429-584  
300 µM ARL15 32-197 **S94K**

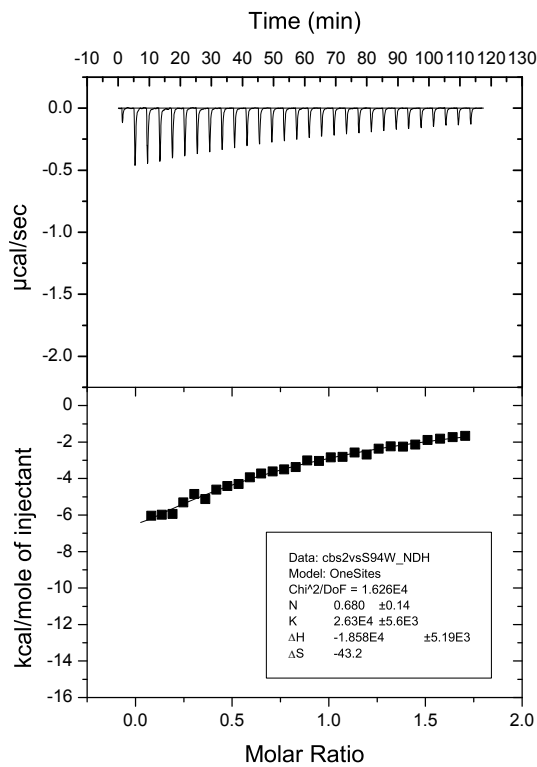

30 µM CNNM2 429-584  
300 µM ARL15 32-197 **S94W**

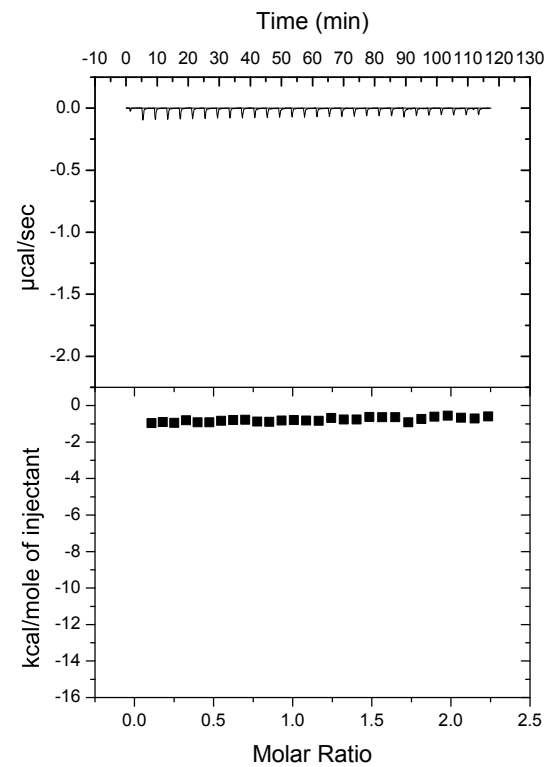

30 µM CNNM2 429-584  
300 µM ARL15 32-197 **R95A**

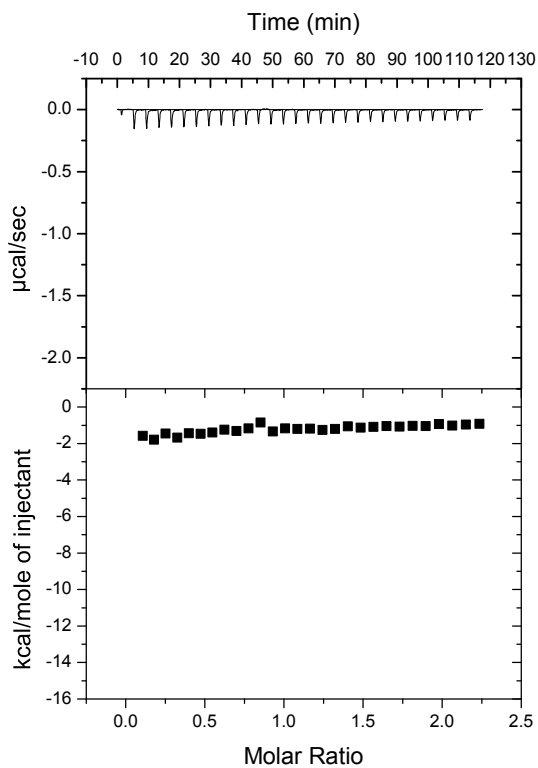

30 µM ARL15 32-197 **P130W**  
300 µM CNNM2 429-584

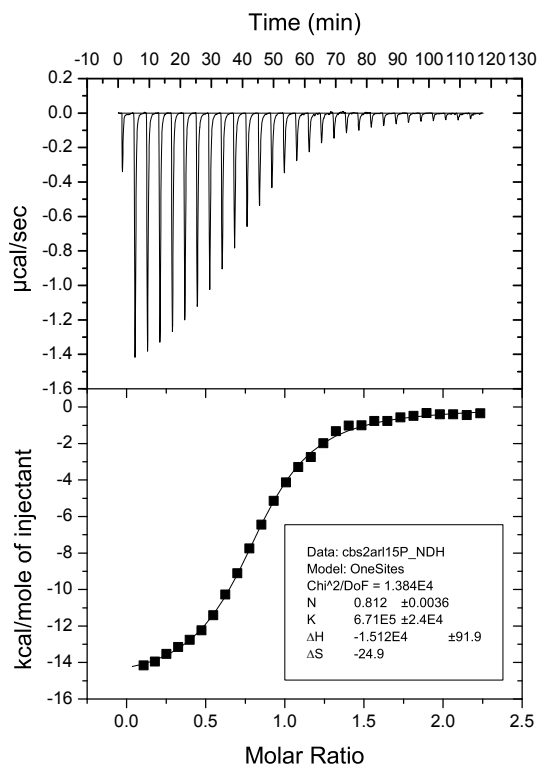

30 µM CNNM2 429-584  
300 µM ARL15 32-197 **P163K**

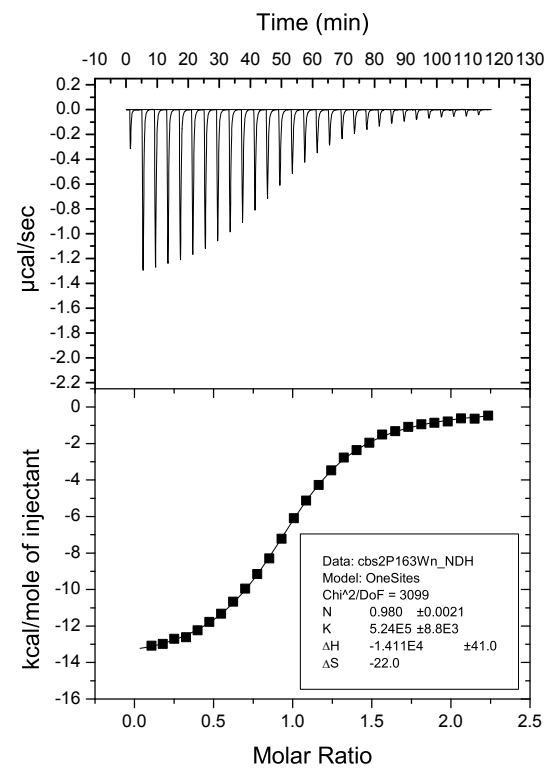

30 µM CNNM2 429-584  
300 µM ARL15 32-197 **P163W**
