# Supplementary material for: Structural insights into regulation of CNNM-TRPM7 divalent cation uptake by the small GTPase ARL15
Source: eLife journal article supplement (doi:10.7554/elife.86129), 2023-07-04

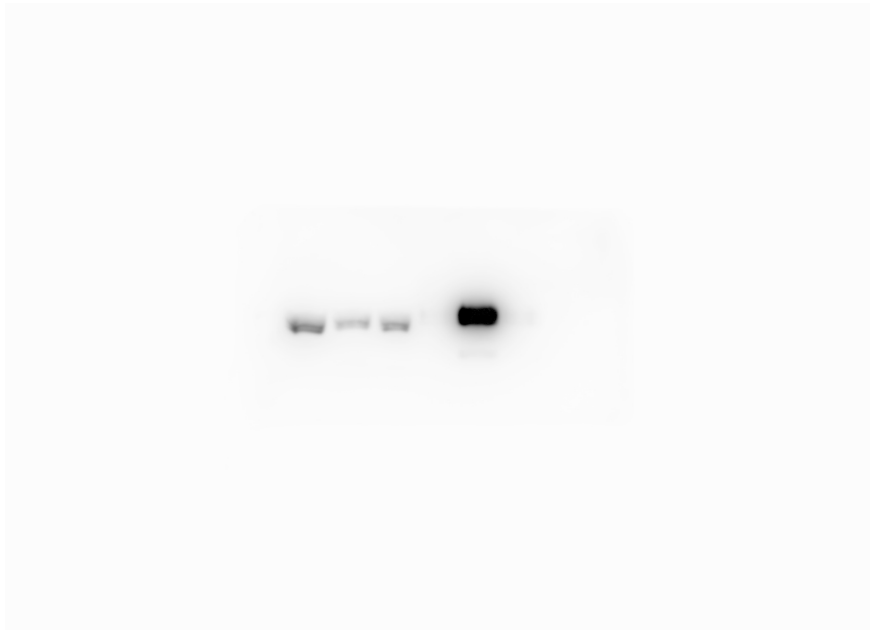

### Anti-CNNM3 Blot

| TCL      |          |      | IP       |          |      |
|----------|----------|------|----------|----------|------|
| No ARL15 | WT ARL15 | R95A | No ARL15 | WT ARL15 | R95A |

◀ CNNM3

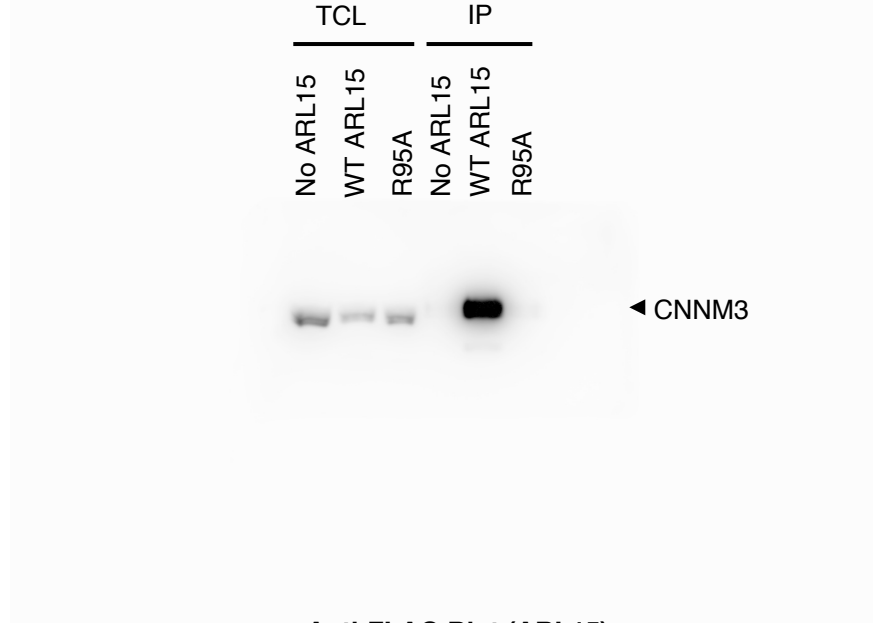

### Anti-FLAG Blot (ARL15)

| TCL      |          |      | IP       |          |      |
|----------|----------|------|----------|----------|------|
| No ARL15 | WT ARL15 | R95A | No ARL15 | WT ARL15 | R95A |

◀ ARL15  
(Anti-FLAG)

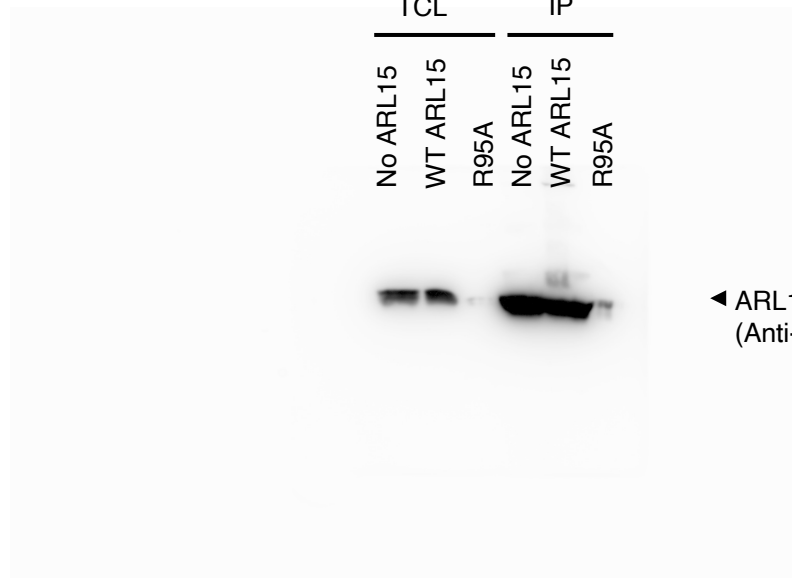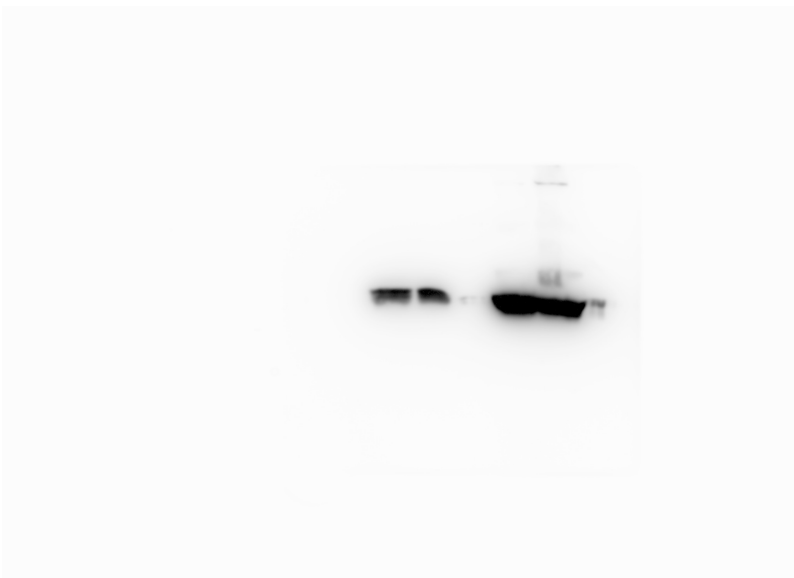

Supplement: fig4-data4 [file elife-86129-fig4-data4-v1.pdf]
