# Supplementary material for: Structural insights into regulation of CNNM-TRPM7 divalent cation uptake by the small GTPase ARL15
Source: eLife journal article supplement (doi:10.7554/elife.86129), 2023-07-04
Supplement: fig5-data2 [file elife-86129-fig5-data2-v1.pdf]

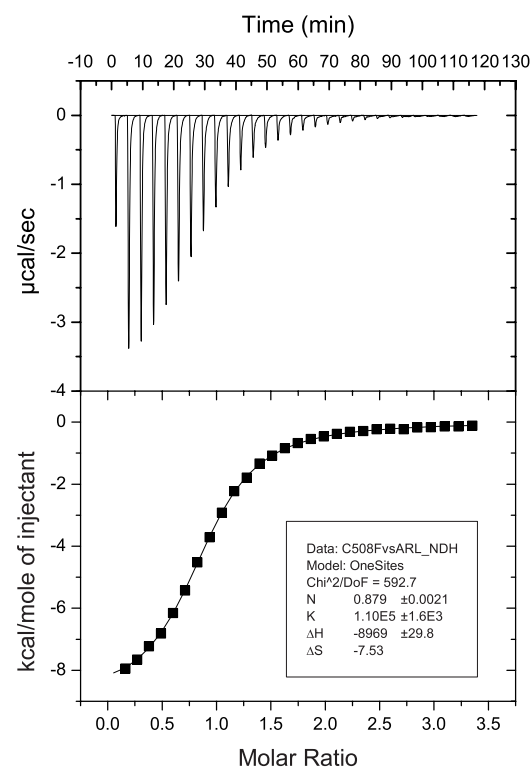

100  $\mu\text{M}$  CNNM1 412-568 **C508F**  
1.5 mM ARL15 32-197

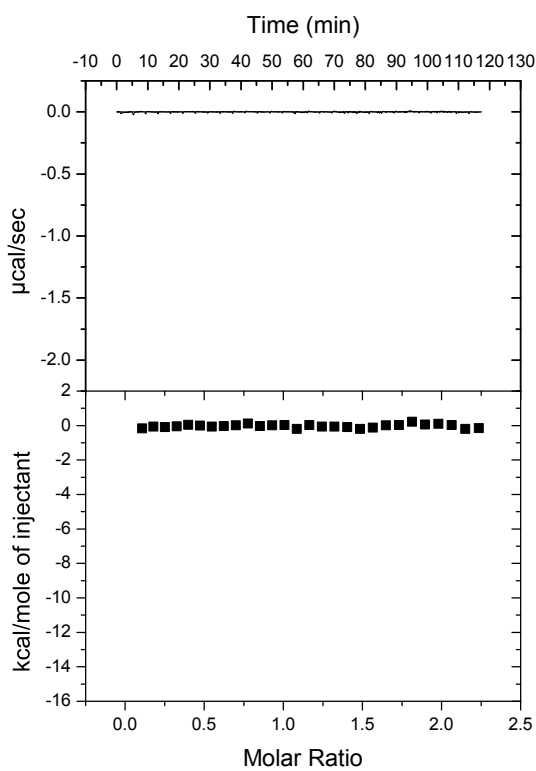

30  $\mu\text{M}$  CNNM2 429-584 **H523K**  
300  $\mu\text{M}$  ARL15 32-197

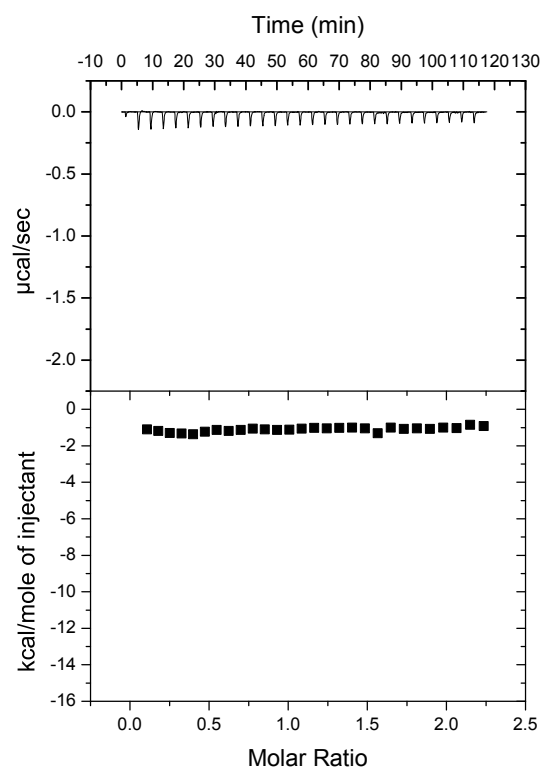

30  $\mu\text{M}$  CNNM2 429-584 **F524K**  
300  $\mu\text{M}$  ARL15 32-197

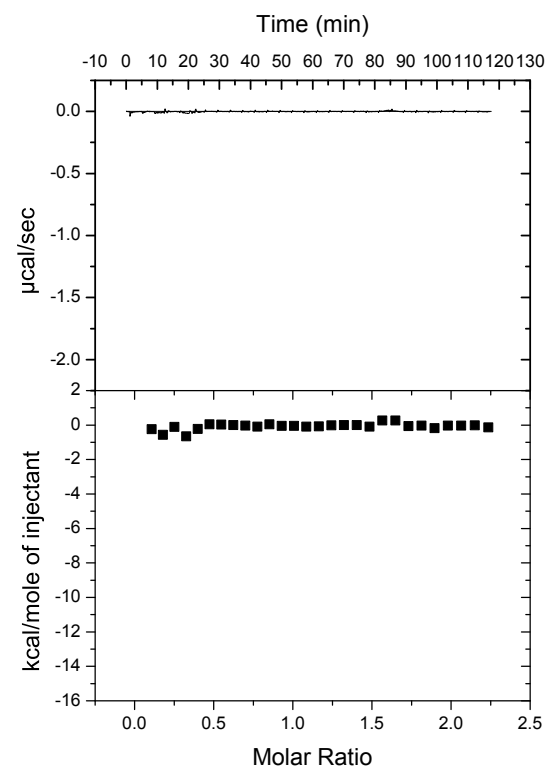

30  $\mu\text{M}$  CNNM3 299-452 **H391K**  
300  $\mu\text{M}$  ARL15 32-197

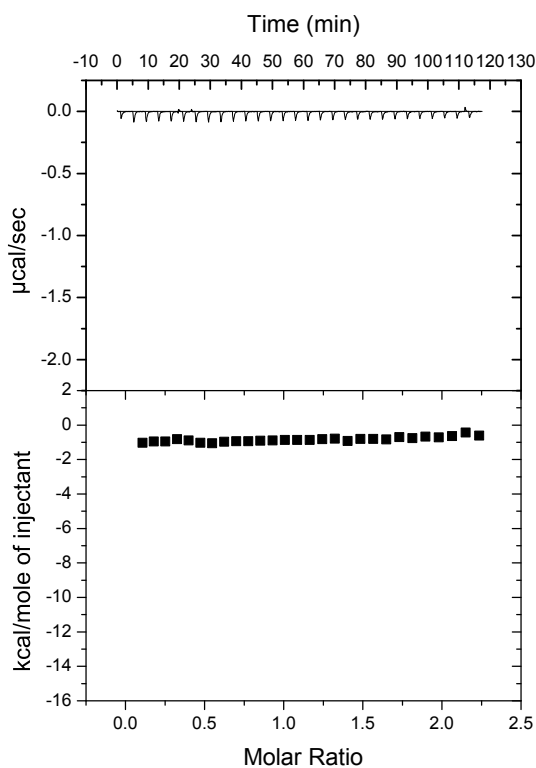

30  $\mu\text{M}$  CNNM3 299-452 **F392K**  
300  $\mu\text{M}$  ARL15 32-197

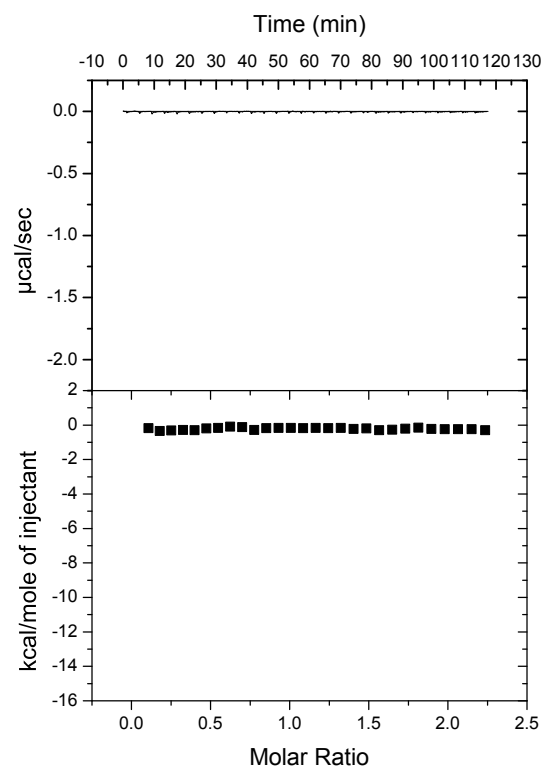

30  $\mu\text{M}$  CNNM4 356-511 **H450K**  
300  $\mu\text{M}$  ARL15 32-197

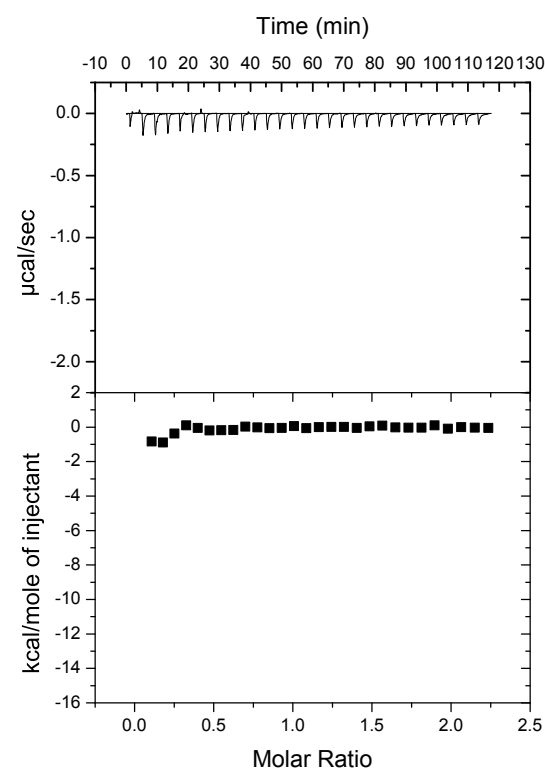

30  $\mu\text{M}$  CNNM4 356-511 **F451K**  
300  $\mu\text{M}$  ARL15 32-197

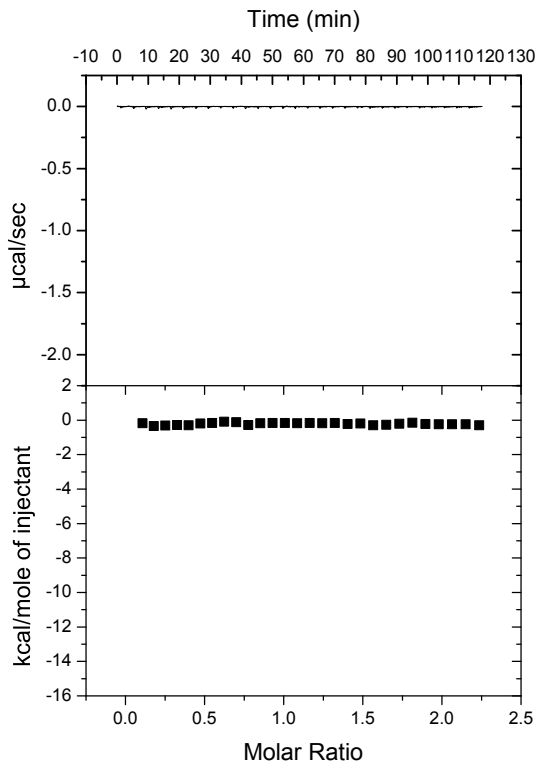

30  $\mu\text{M}$  CNNM4 356-726 **H450K**  
300  $\mu\text{M}$  ARL15 32-197

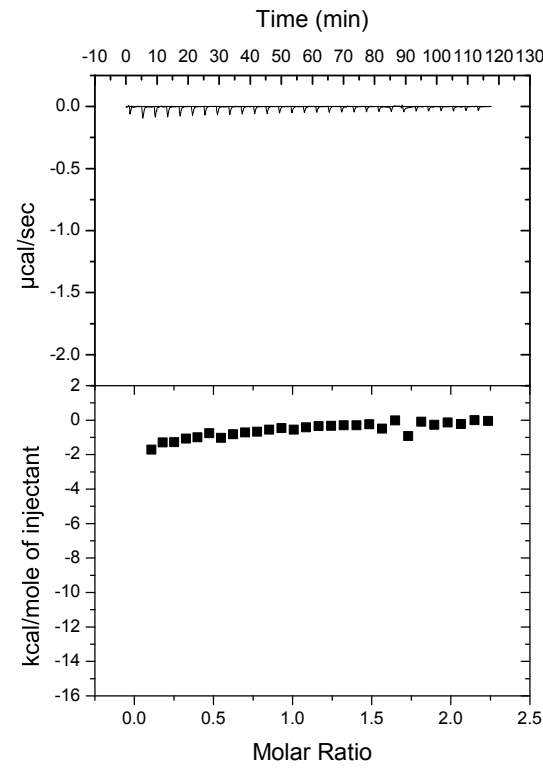

30  $\mu\text{M}$  CNNM4 356-726 **F451K**  
300  $\mu\text{M}$  ARL15 32-197
