# Supplementary material for: Structural insights into regulation of CNNM-TRPM7 divalent cation uptake by the small GTPase ARL15
Source: eLife journal article supplement (doi:10.7554/elife.86129), 2023-07-04
Supplement: fig6-data1 [file elife-86129-fig6-data1-v1.pdf]

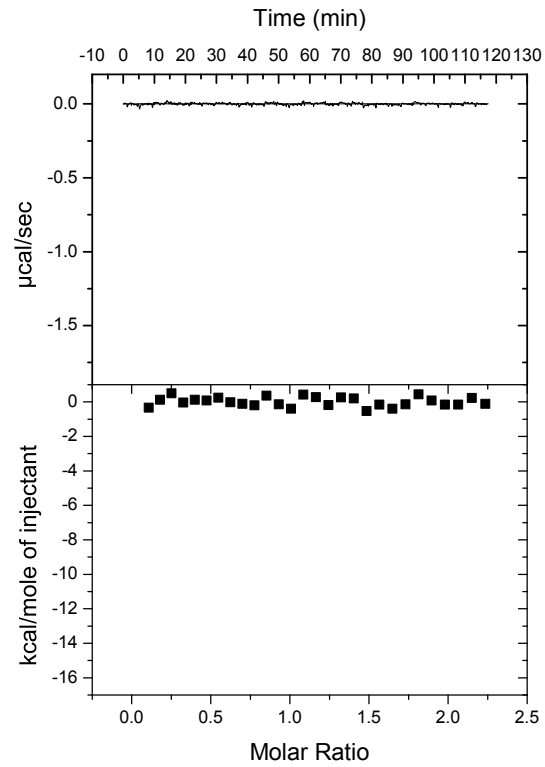

30  $\mu$ M CNNM2 429-584/45  $\mu$ M PRL2 (1-163)  
300  $\mu$ M ARL15 32-197

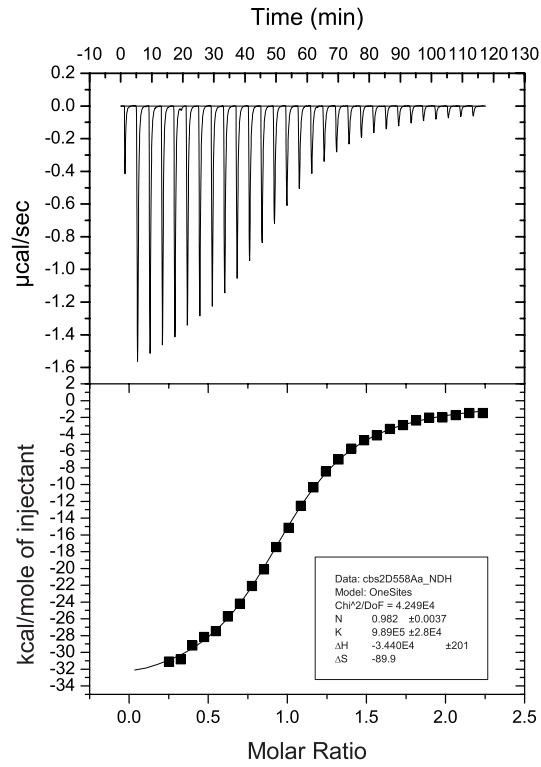

30  $\mu$ M CNNM2 429-584 **D558A**  
300  $\mu$ M ARL15 32-197

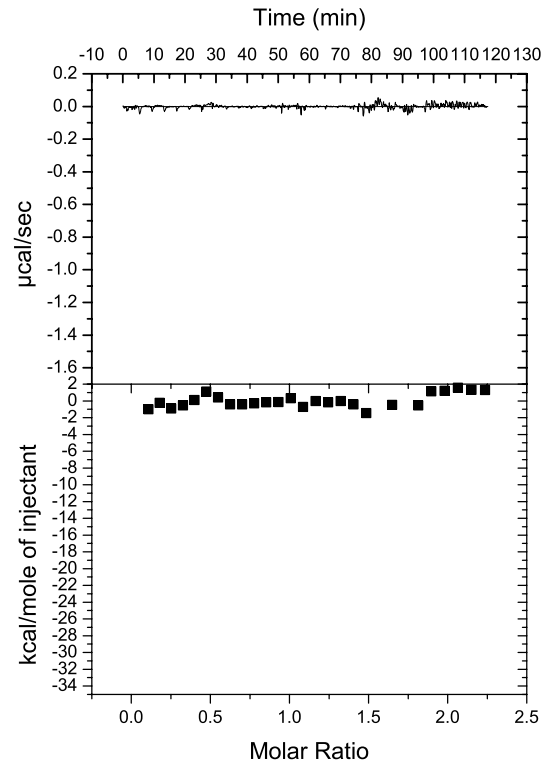

15  $\mu$ M CNNM2 429-584 **D558A**  
150  $\mu$ M PRL2 (1-163)

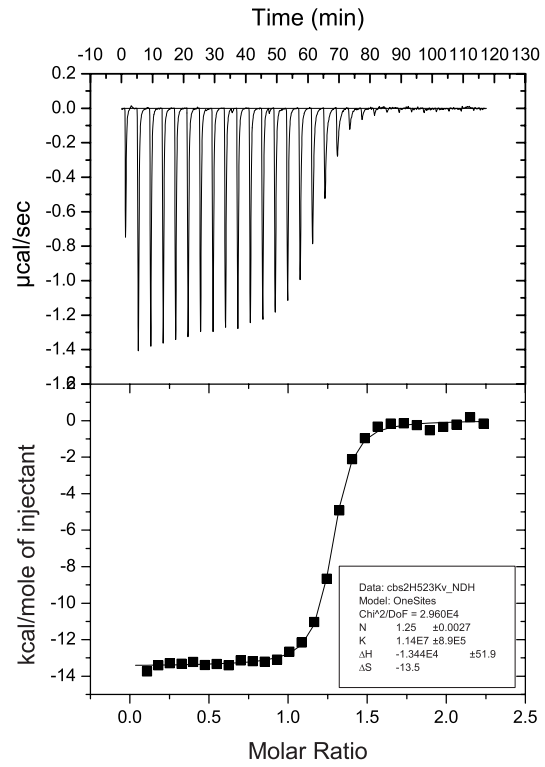

30  $\mu$ M CNNM2 429-584 **H523K**  
300  $\mu$ M PRL2 (1-163)
