# Supplementary material for: Structural insights into regulation of CNNM-TRPM7 divalent cation uptake by the small GTPase ARL15
Source: eLife journal article supplement (doi:10.7554/elife.86129), 2023-07-04

# Change in Mg Green Fluorescence

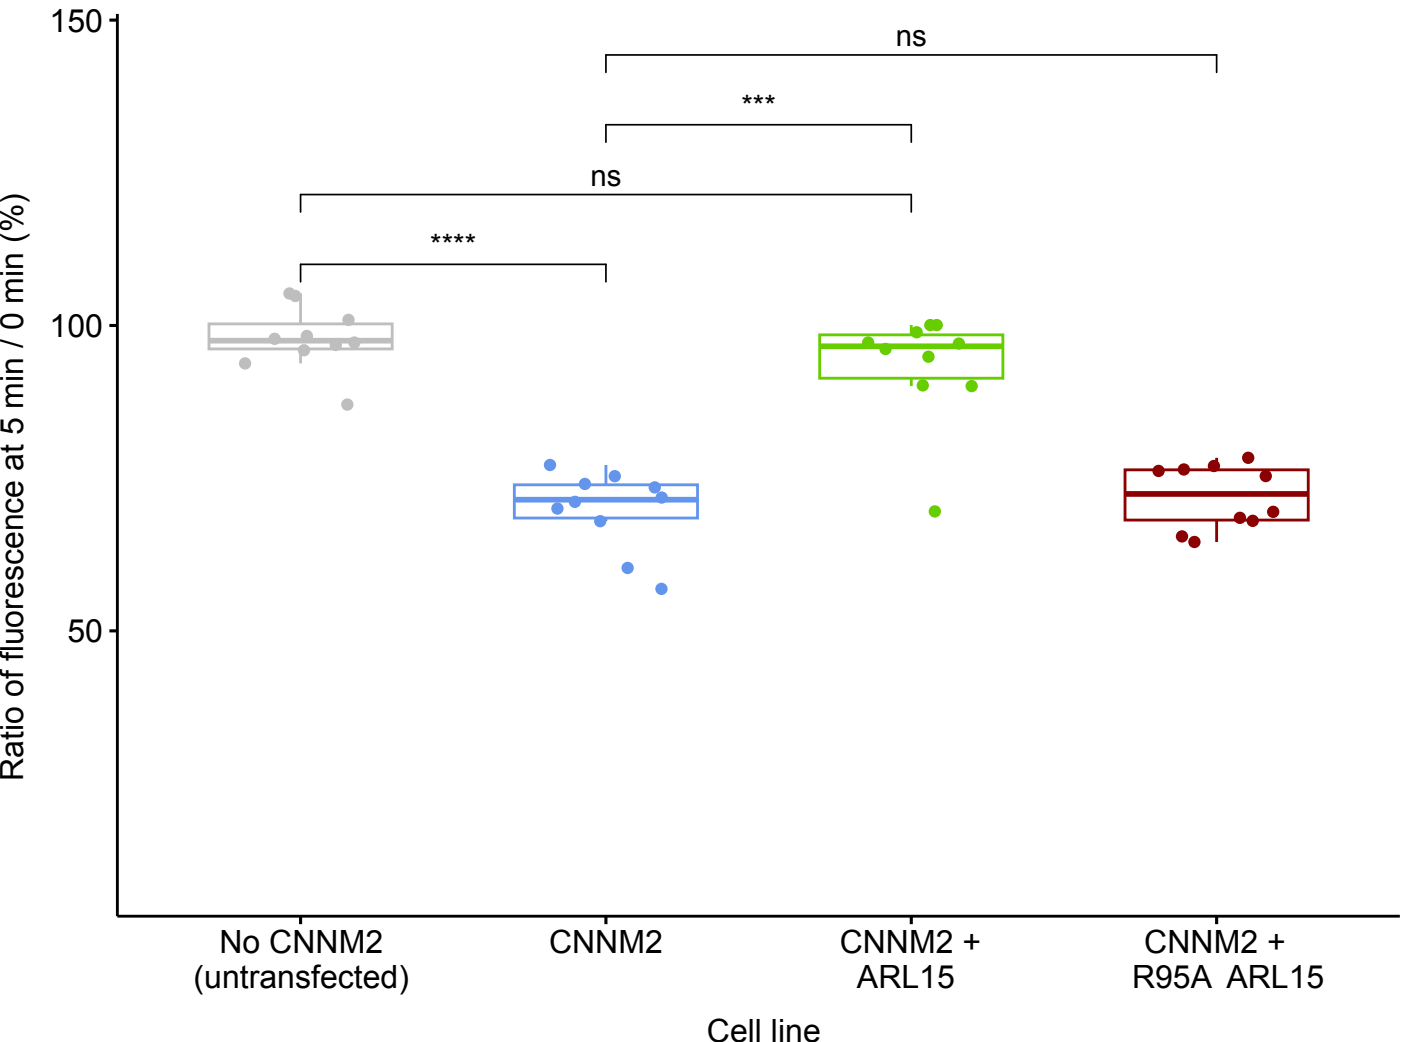

Supplement: fig7-data1 [file elife-86129-fig7-data1-v1.pdf]
